# Supplementary material
Source: publisher site journal article supplement (https://www.spandidos-publications.com/4537/downloadSupplementary)

Figure S1. Transfection efficiency of vectors and RNAs. Relative expression of target RNAs or proteins in HK-2 cells following transfection with (A) si-PVT1, (B) pcDNA-PVT1, (C) miR-27a-3p, (D) anti-miR-27a-3p and (E) OXSR1 as detected by reverse transcription-quantitative PCR or western blotting. \*P<0.05 vs. scramble, pcDNA-NC, NC, anti-NC or vector. miR, microRNA; si, small interfering RNA; OXSR1, oxidative stress responsive kinase 1; PVT1, plasmacytoma variant translocation gene 1; NC, negative control.

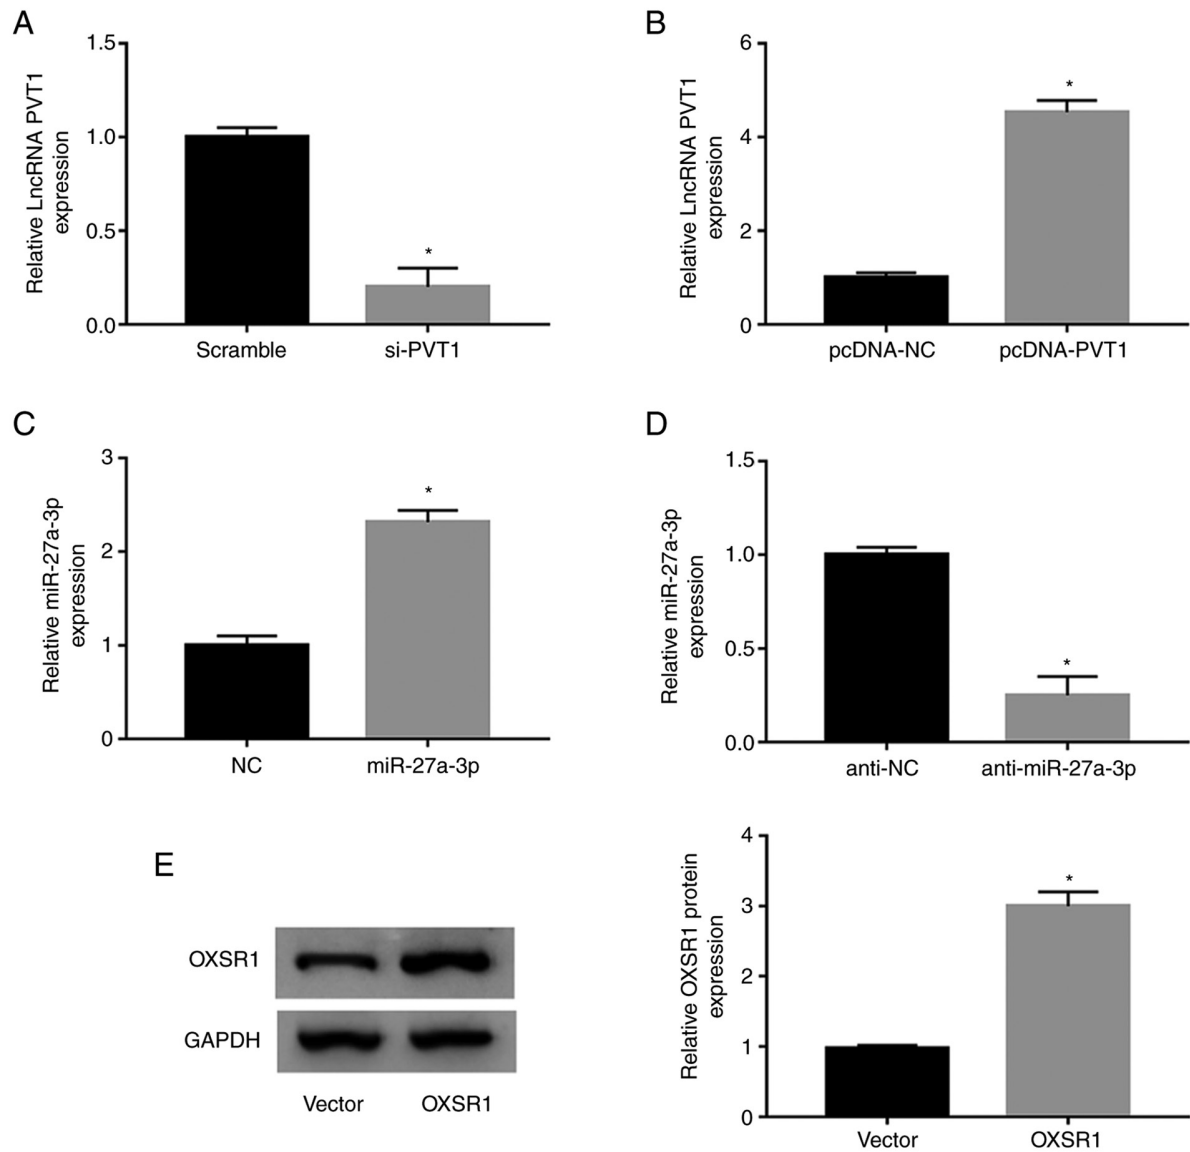

Supplement: Supplementary file 1 [file downloadSupplementary]
